# Supplementary material
Source: publisher figshare collection journal article supplement (https://acs.figshare.com/ndownloader/files/3857251)
Supplement: Supplementary file 1 [file 3857251]

# Gum arabic and $\text{Fe}^{2+}$ synergistically improve the heat and acid stability of norbixin at pH

3.0-5.0

Yongguang Guan and Qixin Zhong\*

Department of Food Science and Technology, University of Tennessee, Knoxville

## Supporting information

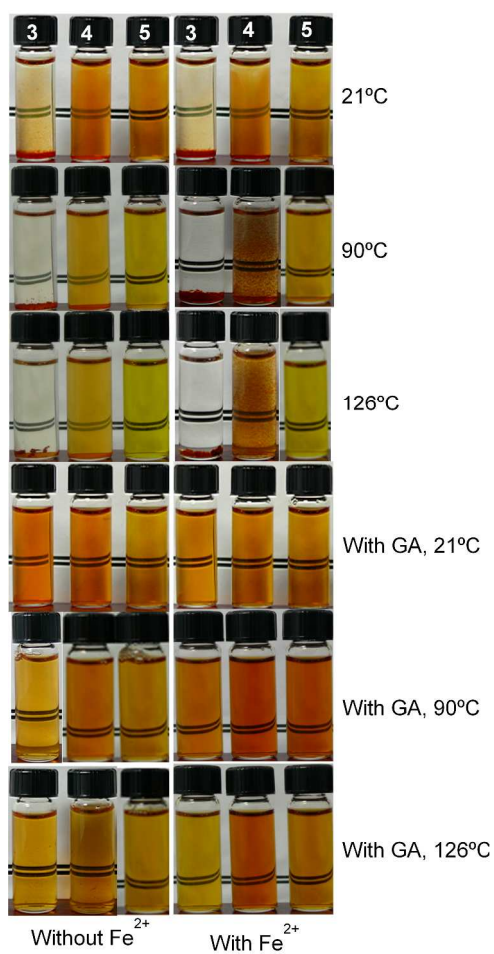

Figure S1. Photographs of dispersions with norbixin, gum arabic and  $\text{Fe}^{2+}$  at pH 3.0, 4.0, and 5.0, before and after heating at 90 or 126 °C for 30 min.

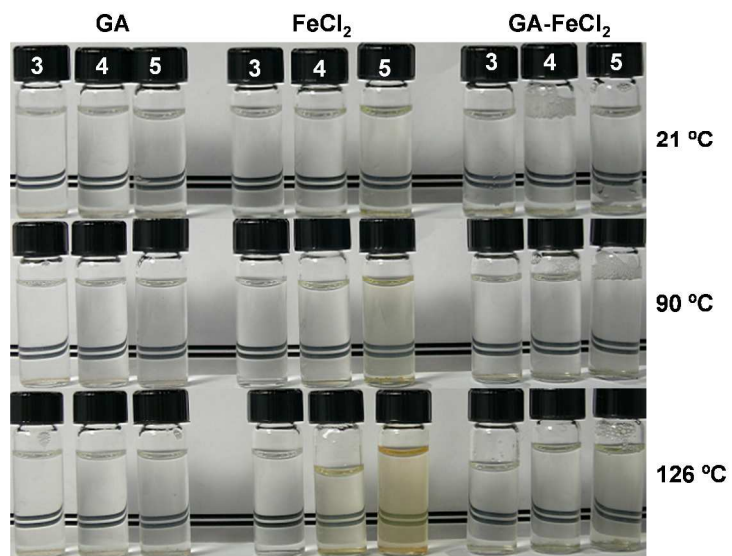

Figure S2. Photographs of 2% w/v GA, 0.02% w/v FeCl<sub>2</sub>, and the mixture with 2% w/v GA and 0.02% w/v FeCl<sub>2</sub> at pH 3.0, 4.0 and 5.0, before and after heating at 90 and 126 °C for 30 min.

Supplemental.

Table S1. Changes of absorbance at 460 nm ( $A_{460}$ ) of norbixin and norbixin-gum arabic (GA) dispersions with and without  $\text{Fe}^{2+}$  at pH 3.0-5.0, before and after heating at 90 or 126°C for 30 min.<sup>ζ</sup>

| Heating temperature          | pH  | $A_{460}$                 |                            |
|------------------------------|-----|---------------------------|----------------------------|
|                              |     | Norbixin                  | Norbixin-GA                |
| None                         | 3.0 | N/D*                      | 0.152±0.041 <sup>ab</sup>  |
|                              | 4.0 | N/D                       | 0.161±0.032 <sup>abc</sup> |
|                              | 5.0 | 0.218±0.046 <sup>cd</sup> | 0.215±0.001 <sup>cd</sup>  |
| 90°C                         | 3.0 | N/D                       | N/D                        |
|                              | 4.0 | N/D                       | 0.128±0.02 <sup>cd</sup>   |
|                              | 5.0 | 0.107±0.018 <sup>a</sup>  | 0.222±0.029 <sup>d</sup>   |
| 126°C                        | 3.0 | N/D                       | N/D                        |
|                              | 4.0 | N/D                       | N/D                        |
|                              | 5.0 | 0.106±0.059 <sup>a</sup>  | 0.232±0.012 <sup>d</sup>   |
| None, with $\text{Fe}^{2+}$  | 3.0 | N/D                       | 0.147±0.001 <sup>ab</sup>  |
|                              | 4.0 | N/D                       | 0.135±0.022 <sup>cd</sup>  |
|                              | 5.0 | 0.226±0.018 <sup>d</sup>  | 0.243±0.002 <sup>d</sup>   |
| 90°C, with $\text{Fe}^{2+}$  | 3.0 | N/D                       | 0.132±0.008 <sup>ab</sup>  |
|                              | 4.0 | N/D                       | 0.228±0.007 <sup>d</sup>   |
|                              | 5.0 | 0.139±0.005 <sup>ab</sup> | 0.251±0.038 <sup>d</sup>   |
| 126°C, with $\text{Fe}^{2+}$ | 3.0 | N/D                       | 0.121±0.050 <sup>a</sup>   |
|                              | 4.0 | N/D                       | 0.189±0.032 <sup>bcd</sup> |
|                              | 5.0 | 0.144±0.002 <sup>a</sup>  | 0.235±0.076 <sup>d</sup>   |

<sup>ζ</sup>Numbers are mean ± standard deviation (n = 3). Different superscript letters represent significant differences in the mean ( $p < 0.05$ ).

\*N/D: not determined due to precipitation.
